# Supplementary material for: High-Intensity Interval Training Decreases Resting Urinary Hypoxanthine Concentration in Young Active Men—A Metabolomic Approach
Source: MDPI journal article supplement (doi:10.3390/metabo9070137), 2019-07-10

# Figure S2: Comparison of LC-MS and NMR metabolite data

| linear regression | $\beta$ -Aminoisobutyrate | Betaine | Carnitine | Creatine | Dimethylamine | N,N-Dimethylglycine | Histidine | TMAO   | Trigonelline |
|-------------------|---------------------------|---------|-----------|----------|---------------|---------------------|-----------|--------|--------------|
| r                 | 0.99                      | 0.95    | 1.00      | 0.93     | 0.97          | 0.98                | 0.99      | 1.00   | 0.99         |
| r <sup>2</sup>    | 0.97                      | 0.90    | 0.99      | 0.87     | 0.94          | 0.96                | 0.98      | 0.99   | 0.99         |
| intercept         | -13.38                    | -1.07   | -1.14     | -6.46    | 21.12         | -5.12               | 50.50     | -17.85 | -3.21        |
| slope             | 0.99                      | 0.94    | 1.18      | 0.81     | 0.64          | 1.25                | 1.11      | 1.46   | 0.94         |

**$\beta$ -Aminoisobutyrate**

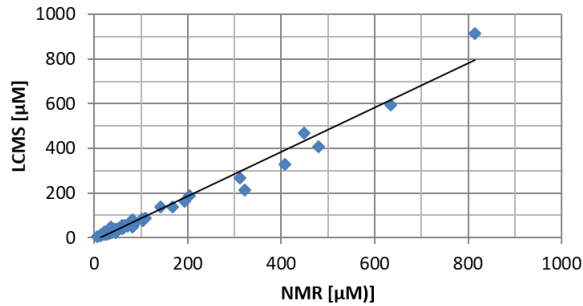

**Betaine**

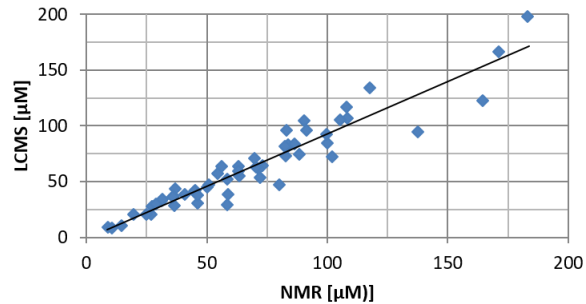

**Carnitine**

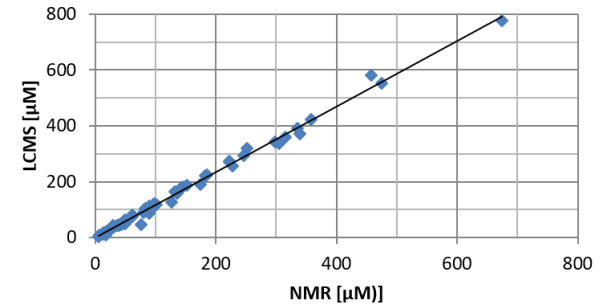

**Creatine**

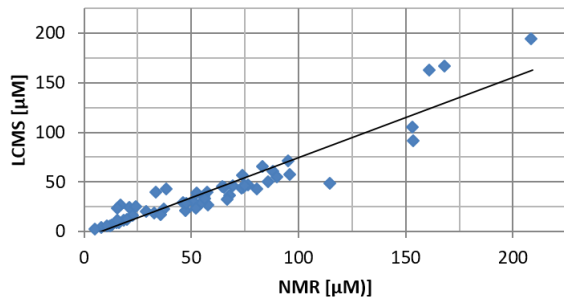

**Dimethylamine**

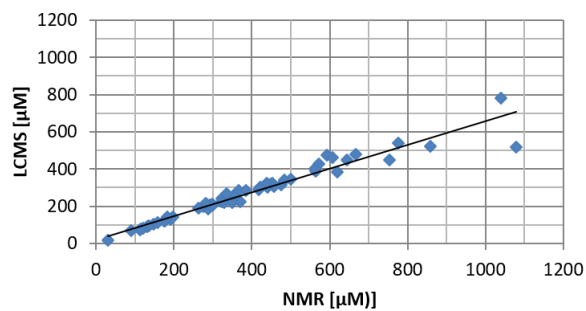

**N,N-Dimethylglycine**

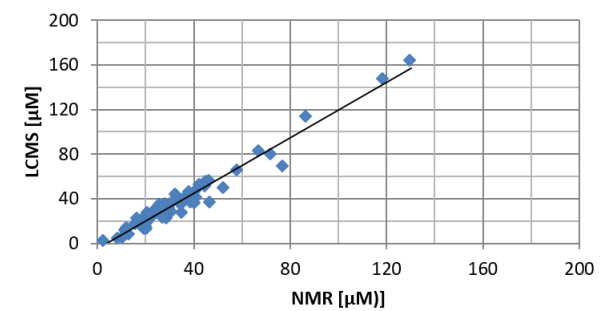

**Histidine**

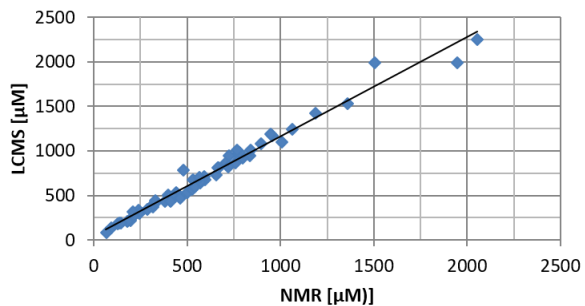

**TMAO**

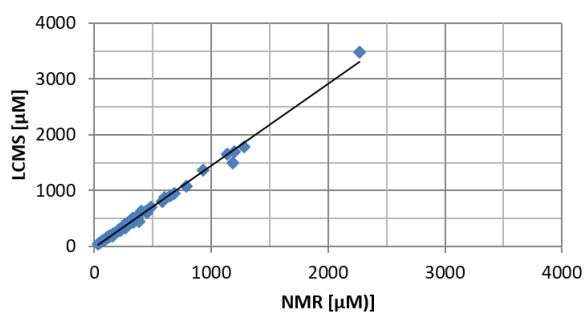

**Trigonelline**

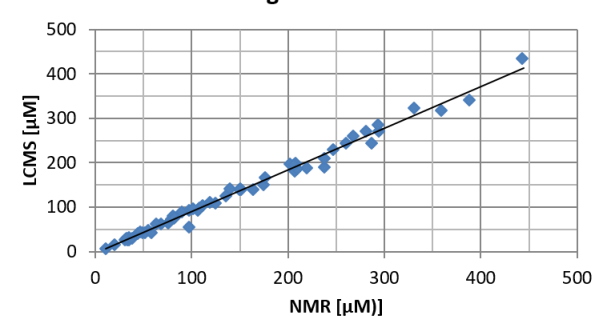

Supplement: s1 [file s1]
