# Supplementary material for: High-Intensity Interval Training Decreases Resting Urinary Hypoxanthine Concentration in Young Active Men—A Metabolomic Approach
Source: MDPI journal article supplement (doi:10.3390/metabo9070137), 2019-07-10
Supplement: s1 [file s1]

**Table S4: LLOQ of LC-MS data**

| <b>Metabolites</b>        | <b>LLOQ [<math>\mu</math>M]</b><br>(S/N 10:1, CV <30%, Bias <30%) | <b>Number of values below LLOQ</b><br>(total sample size = 51) |
|---------------------------|-------------------------------------------------------------------|----------------------------------------------------------------|
| $\beta$ -Aminoisobutyrate | 1.28                                                              | 0                                                              |
| $\gamma$ -Aminobutyrate   | 0.85                                                              | 22                                                             |
| $\gamma$ -Butyrobetaine   | 0.50                                                              | 9                                                              |
| $\pi$ -Methylhistidine    | 10.06                                                             | 2                                                              |
| $\tau$ -Methylhistidine   | 10.81                                                             | 0                                                              |
| ADMA                      | 3.59                                                              | 0                                                              |
| Anserine                  | 24.02                                                             | 51                                                             |
| Arginine                  | 4.33                                                              | 0                                                              |
| Betaine                   | 1.08                                                              | 0                                                              |
| Betonicine                | 1.00                                                              | 31                                                             |
| Carnitine                 | 2.35                                                              | 0                                                              |
| Carnosine                 | 5.31                                                              | 11                                                             |
| Choline                   | 1.23                                                              | 0                                                              |
| Citrulline                | 5.98                                                              | 21                                                             |
| Creatine                  | 10.28                                                             | 7                                                              |
| Dimethylamine             | 12.94                                                             | 0                                                              |
| N,N-Dimethylglycine       | 2.09                                                              | 0                                                              |
| Histidine                 | 13.97                                                             | 0                                                              |
| Hydroxyproline            | 10.29                                                             | 0                                                              |
| N,N-Methylarginine        | 0.73                                                              | 51                                                             |
| N,N-Methylproline         | 0.35                                                              | 2                                                              |
| Proline                   | 2.43                                                              | 1                                                              |
| Sarcosine                 | 1.18                                                              | 37                                                             |
| SDMA                      | 19.42                                                             | 0                                                              |
| Stachydrine               | 1.78                                                              | 1                                                              |
| TMAO                      | 29.85                                                             | 0                                                              |
| Trigonelline              | 2.23                                                              | 0                                                              |
| Trimethylamine            | 0.21                                                              | 0                                                              |
