# Supplementary material for: High-Intensity Interval Training Decreases Resting Urinary Hypoxanthine Concentration in Young Active Men—A Metabolomic Approach
Source: Metabolites. 2019 Jul 10;9(7):137. doi: 10.3390/metabo9070137 (PMC6680906; doi:10.3390/metabo9070137)
Supplement: Supplementary file 1 [file metabolites-09-00137-s001.zip]

Archive with 6 entries (6 files):
- Figure S1_Boxplots of urinary metabolite concentrations measured with LC-MS and NMR.pdf
- Figure_S2_Comparison of LC-MS and NMR metabolite data.pdf
- Table S1_Comparison of creatinine data obtained by NMR and photometric assay.xlsx
- Table S2_Original NMR data.xlsx
- Table S3_Original LC-MS data.xlsx
- Table S4_LLOQ of LC-MS data.pdf
