# Supplementary material for: High-Intensity Interval Training Decreases Resting Urinary Hypoxanthine Concentration in Young Active Men—A Metabolomic Approach
Source: Metabolites. 2019 Jul 10;9(7):137. doi: 10.3390/metabo9070137 (PMC6680906; doi:10.3390/metabo9070137)
Supplement: Supplementary file 1 [file metabolites-09-00137-s001.zip › Table S1_Comparison of creatinine data obtained by NMR and photometric assay.xlsx]

## Sheet: creatinine comparison
Table S1: Comparison of creatinine data obtained by NMR and photometric assay
	Crea mmol/l (NMR)	Crea mmol/l (Photometric Assay)			linear regression
ID	Visit 1	Visit 1			r	0.987844
P01	3.7674	4.1601			r²	0.975835
P02	5.0659	5.77164			intercept	1.02928
P03	20.2676	21.9144			slope	0.988538
P04	13.9138	15.3462
P05	3.6917	3.8728
P06	15.241	17.2468
P07	17.6404	19.8104
P08	14.0927	14.5595
P09 (Dropout)
P10	10.4178	10.8555
P11	28.0398	30.8693
P12	6.503	7.2099
P13	13.0082	13.2954
P14	18.9117	20.7298
P15	18.3775	19.9607
P16	4.6981	5.37737
P17	12.6229	14.1882
P18	17.1833	19.5364
P19	22.1167	22.7453
P20 (Dropout)
ID	Visit 2	Visit 2
P01	18.2945	18.4137
P02	6.5348	7.36637
P03	13.4003	14.0114
P04	13.2924	14.1617
P05	6.1531	6.34093
P06	13.5688	14.7363
P07	11.2691	12.1904
P08	15.5634	16.628
P09 (Dropout)
P10	5.7095	6.55044
P11	15.3719	16.0976
P12	4.8912	5.88656
P13	14.2132	14.9838
P14	25.8716	25.5299
P15	15.162	17.3441
P16	14.351	14.7451
P17	10.6614	11.9428
P18	1.0265	1.12445
P19	11.6726	12.5616
P20 (Dropout)
ID	Visit 3	Visit 3
P01	20.9329	20.9685
P02	10.3955	11.3152
P03	9.6752	10.6699
P04	16.0975	17.4678
P05	3.0021	3.19124
P06	11.5551	12.544
P07	19.1337	22.5332
P08	17.553	18.7408
P09 (Dropout)
P10	6.0736	6.59199
P11	16.0324	15.9474
P12	10.207	11.6069
P13	12.3429	13.1451
P14	10.6989	11.8633
P15	17.142	18.617
P16	3.6435	4.02397
P17	10.2685	11.6688
P18	3.5127	4.03723
P19	35.0753	30.5157
P20 (Dropout)
