# Supplementary material for: High-Intensity Interval Training Decreases Resting Urinary Hypoxanthine Concentration in Young Active Men—A Metabolomic Approach
Source: Metabolites. 2019 Jul 10;9(7):137. doi: 10.3390/metabo9070137 (PMC6680906; doi:10.3390/metabo9070137)
Supplement: Supplementary file 1 [file metabolites-09-00137-s001.zip › Table S2_Original NMR data.xlsx]

## Sheet: raw data NMR (mM)
Table S2: Original NMR data of all metabolites in fasting spot urine samples
ID_Visit	Group	β-Aminoisobutyrate	1-Methylnicotinamide	2-Hydroxyisobutyrate	3-Hydroxyisovalerate	3-Indoxylsulfate	3-Methylxanthine	4-Hydroxyphenylacetate	Acetate	Acetone	Alanine	Betaine	Carnitine	Citrate	Creatine	Creatinine	Dimethylamine	N,N-Dimethylglycine	Dimethylsulfone	Formate	Gluconate	Glycine	Glycolate	Guanidoacetate	Hippurate	Histidine	Hypoxanthine	Isoleucine	Lactate	Leucine	Mannitol	Methanol	Methylamine	Methylsuccinate	Pseudouridine	Pyruvate	Succinate	Tartrate	Taurine	Threonine	TMAO	Trigonelline	Tyrosine	Uracil	Urea	Valine	cis-Aconitate	trans-Aconitate
P01_V1	EG	0.013	0.0183	0.0189	0.018	0.0724	0.0269	0.1154	0.0155	0.0062	0.1057	0.2422	0.1013	2.0017	0.0116	3.7674	0.1307	0.0341	0.0383	0.0484	0.1255	0.807	0.1617	0.0591	0.595	0.1933	0.0304	0.0057	0.0155	0.0098	0.0158	0.0185	0.0117	0.0218	0.0458	0.0066	0.0069	0.0051	0.3387	0.0395	0.118	0.0443	0.0454	0.0149	13.9056	0.0141	0.0451	0.0149
P01_V2	EG	0.0371	0.0933	0.0849	0.0696	0.2484	0.2178	0.2365	0.0428	0.0101	0.4984	0.971	0.3348	8.5795	0.0734	18.2945	0.5719	0.1183	0.0506	0.1272	0.4874	3.1767	0.6573	0.176	4.3639	0.703	0.124	0.0187	0.0829	0.0391	0.1321	0.2417	0.0518	0.0999	0.2113	0.0279	0.0386	0.1275	0.7888	0.1411	1.1953	0.1514	0.1594	0.0693	33.0268	0.0533	0.1922	0.0761
P01_V3	EG	0.0427	0.0826	0.0909	0.0689	0.4085	0.3532	0.3573	0.0381	0.0032	0.4971	1.0963	0.4746	7.8106	0.0948	20.9329	0.6665	0.1296	0.075	0.2948	0.332	3.5803	0.7053	0.088	4.7275	0.8321	0.1407	0.0178	0.0859	0.0493	0.2169	0.2521	0.0826	0.108	0.2479	0.0394	0.0347	0.0221	0.3508	0.1766	0.5825	0.3585	0.1999	0.0761	32.2186	0.0616	0.232	0.086
P02_V1	EG	0.141	0.0131	0.0173	0.0109	0.0528	0.0187	0.022	0.0183	0.0073	0.0521	0.0197	0.0185	0.8627	0.0224	5.0659	0.1479	0.0192	0.0191	0.0468	0.1334	0.3618	0.1331	0.0655	0.5748	0.177	0.0298	0.0047	0.0189	0.0087	0.0181	0.0256	0.0146	0.0222	0.0528	0.0095	0.0062	0.0058	0.2382	0.0314	0.107	0.031	0.0347	0.0367	13.3868	0.0111	0.0416	0.0138
P02_V2	EG	0.2033	0.0201	0.0277	0.017	0.0993	0.0191	0.0386	0.0386	0.009	0.0792	0.0369	0.0828	2.0391	0.0158	6.5348	0.1795	0.0286	0.0234	0.0988	0.1513	0.5413	0.1948	0.1027	0.3639	0.236	0.0319	0.0086	0.0199	0.0111	0.0447	0.0162	0.0109	0.0337	0.0708	0.0097	0.0159	0.0067	0.1217	0.048	0.1188	0.0313	0.0541	0.0523	21.3873	0.0176	0.0574	0.0206
P02_V3	EG	0.3112	0.0221	0.0329	0.0195	0.1222	0.0532	0.0512	0.0422	0.0072	0.1642	0.0631	0.2521	2.5422	0.0468	10.3955	0.275	0.0295	0.026	0.1301	0.2766	0.907	0.3093	0.1337	0.9671	0.3933	0.0586	0.006	0.0432	0.0166	0.0979	0.0186	0.0199	0.0582	0.1097	0.018	0.0279	0.0061	0.0987	0.0782	0.3061	0.0684	0.0594	0.073	30.9908	0.0232	0.1169	0.0307
P03_V1	CG	0.061	0.083	0.0698	0.0521	0.4504	0.0074	0.0911	0.0368	0.0162	0.2854	0.0903	0.0429	3.5786	0.0827	20.2676	0.5919	0.0408	0.0583	0.1543	0.386	1.5894	0.8184	0.0695	2.6528	0.9512	0.1618	0.0137	0.0613	0.0402	0.0205	0.0174	0.0447	0.0837	0.2118	0.06	0.0276	0.0848	1.7155	0.1628	0.5995	0.0971	0.1011	0.1119	39.1053	0.0495	0.165	0.0602
P03_V2	CG	0.0377	0.0983	0.0395	0.0399	0.2207	0.0073	0.0762	0.0331	0.0137	0.1987	0.1	0.183	2.1144	0.074	13.4003	0.351	0.035	0.0164	0.1335	0.2588	0.9835	0.3689	0.0383	1.3321	0.7138	0.1157	0.0099	0.0348	0.0203	0.1255	0.019	0.0336	0.0628	0.1306	0.0335	0.0296	0.009	1.1528	0.1242	0.3301	0.0351	0.0771	0.0497	27.5209	0.0313	0.1126	0.0376
P03_V3	CG	0.0443	0.063	0.0373	0.0367	0.2424	0.0581	0.0478	0.0336	0.0133	0.1895	0.0831	0.145	2.0795	0.0285	9.6752	0.2634	0.0347	0.0258	0.1744	0.15	1.0093	0.3914	0.0714	0.7851	0.4744	0.0927	0.0081	0.0339	0.0182	0.0783	0.0295	0.0299	0.0672	0.0972	0.0193	0.0267	0.0088	0.8438	0.1051	0.4869	0.0346	0.0597	0.0404	31.9892	0.026	0.0748	0.0254
P04_V1	EG	0.0786	0.0606	0.0683	0.0518	0.1508	0.1003	0.0698	0.0275	0.0157	0.1117	0.0453	0.061	1.8854	0.057	13.9138	0.3666	0.0201	0.0359	0.1422	0.2455	0.6359	0.3783	0.1564	1.3789	0.3978	0.1191	0.0058	0.0352	0.0214	0.1234	0.0179	0.0231	0.0876	0.1319	0.0327	0.0424	0.0127	0.5697	0.0754	0.262	0.2673	0.0753	0.0651	36.0478	0.0199	0.1441	0.0352
P04_V2	EG	0.0645	0.0895	0.0469	0.0515	0.287	0.072	0.0974	0.0167	0.0076	0.1509	0.0635	0.2228	2.0551	0.0575	13.2924	0.3321	0.0255	0.0356	0.1581	0.278	0.8688	0.4091	0.0481	1.0005	0.5893	0.0586	0.0084	0.0408	0.0257	0.2122	0.0169	0.0295	0.0926	0.1376	0.026	0.0468	0.0062	0.1718	0.1151	0.2667	0.2075	0.0894	0.0536	28.3319	0.0277	0.143	0.0406
P04_V3	EG	0.1929	0.0771	0.0647	0.0485	0.4838	0.0661	0.0903	0.0241	0.0368	0.0982	0.0503	0.1359	2.5783	0.0676	16.0975	0.4488	0.019	0.0618	0.1387	0.2902	0.653	0.462	0.1313	2.9891	0.4955	0.0963	0.0069	0.0424	0.0193	0.0683	0.0342	0.0397	0.1097	0.1599	0.0261	0.0743	0.0061	0.0394	0.0754	0.9316	0.2941	0.0865	0.0624	37.1531	0.0273	0.2205	0.0532
P05_V1	EG	0.0237	0.0084	0.0156	0.0123	0.1053	0.024	0.0587	0.0196	0.007	0.0437	0.0145	0.0125	0.7229	0.0125	3.6917	0.1122	0.0103	0.0354	0.0638	0.1307	0.348	0.0705	0.0583	0.6191	0.1243	0.0246	0.0021	0.0135	0.0049	0.0219	0.0296	0.024	0.0142	0.0464	0.0061	0.0053	0.0193	0.0932	0.0156	0.0819	0.2197	0.0254	0.0407	13.1344	0.0065	0.032	0.0122
P05_V2	EG	0.1033	0.0308	0.0307	0.0293	0.3018	0.0401	0.0729	0.0513	0.0114	0.0767	0.0268	0.0075	1.2724	0.0182	6.1531	0.198	0.0111	0.0602	0.0858	0.2008	0.5145	0.146	0.0926	2.2698	0.2409	0.0334	0.0044	0.0199	0.0103	0.0655	0.0646	0.028	0.0324	0.0765	0.0075	0.032	0.0552	0.5412	0.0259	0.1675	0.2465	0.037	0.08	26.9735	0.0139	0.0659	0.045
P05_V3	EG	0.0372	0.0166	0.0139	0.0111	0.1011	0.0133	0.0153	0.0225	0.0092	0.0251	0.009	0.0222	0.6245	0.0075	3.0021	0.0898	0.0082	0.036	0.0413	0.0867	0.2325	0.0658	0.0428	0.675	0.0914	0.0181	0.0014	0.0073	0.0039	0.0264	0.0369	0.0045	0.0119	0.035	0.005	0.0042	0.0167	0.1012	0.0074	0.0547	0.1351	0.0152	0.0349	11.7625	0.0054	0.0211	0.0091
P06_V1	CG	0.0832	0.1125	0.0538	0.0531	0.244	0.037	0.0838	0.0494	0.0125	0.1525	0.1084	0.3585	1.3572	0.0801	15.241	0.3846	0.036	0.0452	0.3089	0.2876	0.9701	0.7865	0.2099	1.9757	0.9446	0.1119	0.0111	0.049	0.0287	0.0639	0.0248	0.0312	0.0666	0.142	0.0184	0.0333	0.0153	3.7779	0.0956	0.4466	0.0634	0.0981	0.0785	30.2117	0.0382	0.1228	0.0359
P06_V2	CG	0.102	0.0737	0.053	0.0639	0.4005	0.0571	0.0804	0.0447	0.0106	0.174	0.102	0.1269	1.263	0.0332	13.5688	0.3287	0.0406	0.03	0.2364	0.2376	0.6422	0.6622	0.2125	1.9855	0.6624	0.1266	0.0094	0.0238	0.0253	0.0767	0.0382	0.0363	0.0743	0.1227	0.024	0.0043	0.0155	2.3052	0.0573	0.4499	0.0791	0.0682	0.1038	40.2619	0.0329	0.1321	0.0126
P06_V3	CG	0.0816	0.1241	0.0417	0.0508	0.2824	0.0233	0.0737	0.0307	0.0139	0.1125	0.0729	0.2273	0.7516	0.0691	11.5551	0.3	0.0304	0.0253	0.2046	0.187	0.4646	0.5566	0.1194	1.1784	0.5882	0.1542	0.0058	0.0308	0.0195	0.0261	0.0209	0.0271	0.0545	0.1027	0.0139	0.0306	0.0143	1.5314	0.0276	1.1859	0.0332	0.0666	0.0829	36.7821	0.0244	0.1136	0.0219
P07_V1	EG	0.8138	0.0284	0.079	0.0433	0.2744	0.0188	0.0877	0.023	0.0211	0.1282	0.056	0.1318	4.0298	0.0877	17.6404	1.0386	0.02	0.0284	0.1238	0.4248	0.6262	0.3702	0.1605	0.9881	0.5667	0.0397	0.0076	0.052	0.0246	0.1228	0.0194	0.0256	0.0644	0.1931	0.0338	0.0186	0.0273	0.1683	0.0766	2.2695	0.3307	0.0697	0.1028	27.1212	0.0338	0.1797	0.0579
P07_V2	EG	0.1677	0.0184	0.0576	0.03	0.1035	0.1287	0.0718	0.0261	0.0127	0.1403	0.0362	0.0213	3.1858	0.0457	11.2691	0.3236	0.0202	0.0394	0.1652	0.4121	0.5449	0.2829	0.1558	1.9526	0.4372	0.0342	0.0085	0.0448	0.023	0.221	0.0366	0.0182	0.0516	0.1413	0.0371	0.0131	0.013	0.1904	0.0597	0.2085	0.2017	0.0687	0.0921	26.5966	0.0265	0.1515	0.0381
P07_V3	EG	0.4791	0.0354	0.1024	0.0461	0.2347	0.0347	0.3558	0.0327	0.0189	0.2023	0.0714	0.142	4.9079	0.2085	19.1337	0.6443	0.0178	0.0426	0.1681	0.5648	0.6061	0.2389	0.0336	0.775	0.5652	0.0304	0.0086	0.0518	0.0324	0.433	0.0169	0.0383	0.069	0.2241	0.0446	0.0247	0.0941	0.157	0.0684	0.3274	0.2934	0.1134	0.0638	24.3662	0.0343	0.3215	0.1001
P08_V1	CG	0.0827	0.1997	0.0513	0.0507	0.285	0.0234	0.0876	0.0282	0.0135	0.1569	0.0828	0.0767	1.9891	0.168	14.0927	0.4403	0.0447	0.032	0.137	0.2649	0.7353	0.7554	0.2474	6.2271	1.1836	0.0878	0.0104	0.0464	0.0287	0.0673	0.0235	0.0325	0.1349	0.1587	0.0215	0.0196	0.0138	0.456	0.1304	0.6808	0.2071	0.1449	0.0877	29.1474	0.0416	0.0985	0.0446
P08_V2	CG	0.0417	0.113	0.0517	0.0424	0.1338	0.0416	0.0821	0.037	0.012	0.1352	0.0722	0.0967	2.1023	0.065	15.5634	0.4535	0.0233	0.0235	0.1064	0.1826	0.556	0.5127	0.189	2.7091	0.7799	0.1293	0.0085	0.051	0.0229	0.0965	0.027	0.0191	0.1058	0.1667	0.0216	0.0227	0.0733	1.2364	0.0785	0.1426	0.2867	0.1086	0.1046	28.6666	0.0338	0.1414	0.0055
P08_V3	CG	0.0709	0.1125	0.0602	0.051	0.1533	0.201	0.0828	0.0737	0.0164	0.1521	0.0829	0.1851	3.8009	0.0556	17.553	0.754	0.0313	0.0553	0.2351	0.3246	0.8994	0.577	0.2516	4.9565	0.8362	0.2094	0.0106	0.0454	0.0385	0.1013	0.022	0.0246	0.134	0.1883	0.0215	0.0317	0.0251	0.9005	0.122	1.1383	0.2377	0.145	0.0958	40.3023	0.0381	0.1443	0.0485
P09_V1	CG	0.0628	0.1067	0.0782	0.0715	0.3227	0.0422	0.1002	0.0463	0.0118	0.3587	0.171	0.3395	1.9517	0.0367	16.3236	0.4216	0.0865	0.0426	0.2274	0.2885	1.2643	0.4045	0.1201	2.1736	1.0014	0.268	0.0129	0.0666	0.0421	0.1037	0.0269	0.0322	0.1726	0.1763	0.0293	0.0258	0.3053	1.1231	0.1045	0.2249	0.1745	0.1377	0.1946	49.48	0.0496	0.163	0.0375
P09_V2	CG	0.0137	0.0245	0.0244	0.0205	0.1239	0.0197	0.1496	0.0267	0.0088	0.1122	0.0507	0.0518	0.8809	0.0322	6.5829	0.1906	0.0239	0.0237	0.0754	0.158	0.4083	0.2169	0.0744	5.4592	0.3306	0.0389	0.004	0.0262	0.0138	0.1327	0.0346	0.0191	0.0446	0.0695	0.0077	0.0246	0.0105	0.6823	0.0451	0.1136	0.055	0.0775	0.0342	19.3316	0.0179	0.0677	0.018
P09_V3	CG	0.058	0.0902	0.0701	0.0567	0.262	0.0465	0.0697	0.0346	0.0172	0.2366	0.1175	0.6739	2.5501	0.0665	15.6922	0.4226	0.0718	0.0313	0.2379	0.2953	0.9417	0.329	0.0156	1.4949	0.7525	0.165	0.0113	0.0372	0.033	0.2293	0.0267	0.0264	0.1155	0.1558	0.0143	0.0471	0.0174	0.7366	0.1101	0.202	0.2091	0.124	0.1276	31.3432	0.041	0.1291	0.0429
P10_V1	CG	0.046	0.0588	0.04	0.0263	0.1508	0.0585	0.0855	0.0293	0.0121	0.1211	0.0408	0.0458	3.487	0.0166	10.4178	0.293	0.0203	0.0478	0.1271	0.3197	0.4441	0.2002	0.1727	2.31	0.3122	0.1082	0.0076	0.044	0.0198	0.052	0.0528	0.0188	0.0542	0.1127	0.0203	0.0366	0.0121	0.0197	0.0545	0.1639	0.1763	0.1117	0.0698	23.2319	0.024	0.1263	0.0353
P10_V2	CG	0.0186	0.0343	0.0236	0.0147	0.1447	0.022	0.0534	0.025	0.0125	0.0818	0.0365	0.0181	1.9005	0.0354	5.7095	0.1763	0.0206	0.0488	0.0751	0.1438	0.2916	0.1514	0.0982	1.4336	0.2104	0.0576	0.0058	0.0322	0.012	0.0553	0.0346	0.0183	0.0404	0.0684	0.0061	0.0361	0.0112	0.0403	0.0348	0.1274	0.1186	0.0805	0.0558	17.9355	0.0148	0.066	0.0215
P10_V3	CG	0.0321	0.0427	0.0235	0.012	0.114	0.019	0.0482	0.0143	0.0096	0.0803	0.0449	0.0497	1.6121	0.0207	6.0736	0.1832	0.0163	0.0495	0.0628	0.1966	0.2845	0.161	0.0966	2.2828	0.2072	0.0523	0.0048	0.0274	0.0105	0.1662	0.048	0.0192	0.04	0.065	0.0149	0.0095	0.0149	0.0549	0.0332	0.1237	0.15	0.074	0.0442	19.5497	0.0136	0.0732	0.022
P11_V1	EG	0.6334	0.058	0.1362	0.1401	0.6802	0.0681	0.1312	0.0719	0.0069	0.5597	0.0837	0.1524	5.6603	0.153	28.0398	0.8591	0.0461	0.0508	0.3188	0.3242	2.3479	0.8532	0.2001	8.7612	0.5626	0.2116	0.0206	0.1225	0.0571	0.0681	0.0177	0.0567	0.1727	0.3158	0.0829	0.0173	0.0243	0.2753	0.2091	0.5893	0.3878	0.2218	0.1756	37.3005	0.0741	0.3581	0.1348
P11_V2	EG	0.4497	0.0404	0.065	0.0653	0.765	0.0837	0.1333	0.0541	0.0073	0.3462	0.0463	0.0137	1.7456	0.0729	15.3719	0.4758	0.0206	0.0367	0.181	0.2841	1.1469	0.6532	0.16	2.7352	1.0603	0.055	0.0142	0.0923	0.0415	0.1676	0.0141	0.0603	0.11	0.1732	0.0373	0.0202	0.0445	0.1649	0.1067	0.6512	0.2057	0.1379	0.0771	37.518	0.0526	0.2192	0.062
P11_V3	EG	0.4077	0.0356	0.0849	0.0543	0.2402	0.1864	0.0832	0.0488	0.0045	0.3687	0.0461	0.0389	4.1413	0.052	16.0324	0.5	0.0248	0.0466	0.1957	0.3398	1.8516	0.6997	0.2117	2.7321	1.36	0.1198	0.0144	0.102	0.0404	0.3018	0.0196	0.0442	0.1024	0.2015	0.049	0.0251	0.0106	0.2373	0.1481	0.2361	0.2374	0.1483	0.1313	26.8344	0.0471	0.2016	0.0614
P12_V1	EG	0.0222	0.0285	0.029	0.0247	0.1903	0.0446	0.0467	0.0215	0.0077	0.088	0.0312	0.0611	0.8016	0.2585	6.503	0.1746	0.0206	0.0513	0.1347	0.1555	0.4405	0.2364	0.0995	1.2692	0.4364	0.0475	0.0048	0.0252	0.0169	0.082	0.0242	0.026	0.0552	0.0705	0.0142	0.0123	0.0149	0.2699	0.0413	0.2552	0.1497	0.0657	0.0842	25.6218	0.0176	0.0591	0.0201
P12_V2	EG	0.0268	0.0178	0.0232	0.023	0.1365	0.0389	0.0816	0.0203	0.0078	0.0889	0.0359	0.089	0.6171	2.038	4.8912	0.1352	0.0283	0.041	0.1835	0.1347	0.2599	0.2055	0.0723	0.6005	0.3755	0.0294	0.0032	0.0235	0.0105	0.0333	0.026	0.1196	0.0592	0.0547	0.0123	0.0095	0.0049	0.051	0.0357	0.2956	0.0488	0.0592	0.0659	24.4934	0.0148	0.0392	0.0149
P12_V3	EG	0.0363	0.0462	0.0408	0.0318	0.3284	0.0915	0.088	0.0354	0.005	0.1288	0.0631	0.2981	1.1997	0.1074	10.207	0.2871	0.0296	0.0584	0.3107	0.2483	0.7545	0.467	0.0958	0.947	0.6494	0.0597	0.0077	0.036	0.0247	0.072	0.0179	0.0366	0.0852	0.1114	0.0129	0.0192	0.0242	0.1778	0.1038	0.3829	0.1637	0.1134	0.1179	30.1677	0.0321	0.0653	0.0305
P13_V1	CG	0.0617	0.0942	0.0374	0.0356	0.2798	0.0837	0.1086	0.0216	0.0068	0.144	0.0915	0.0889	2.0854	0.0535	13.0082	0.353	0.0257	0.0353	0.149	0.325	0.7291	0.5087	0.1481	3.7134	0.6584	0.1039	0.0087	0.0299	0.0232	0.0066	0.0146	0.0276	0.0866	0.1288	0.0201	0.0379	0.0248	0.2489	0.1391	0.3671	0.0802	0.1025	0.1065	23.8448	0.0378	0.1254	0.0336
P13_V2	CG	0.0608	0.056	0.0444	0.0367	0.2606	0.0674	0.1419	0.0331	0.0065	0.2233	0.1015	0.217	2.7658	0.0325	14.2132	0.3811	0.0365	0.0547	0.1834	0.3104	1.1195	0.5491	0.2787	5.0239	0.9116	0.1515	0.0097	0.069	0.0329	0.0835	0.0235	0.0356	0.1052	0.1405	0.031	0.025	0.0091	0.1345	0.1374	0.6478	0.1212	0.1475	0.1104	31.4384	0.0453	0.1399	0.0327
P13_V3	CG	0.0629	0.0581	0.0431	0.0395	0.1669	0.0076	0.0567	0.0253	0.0112	0.2221	0.1052	0.0933	3.1069	0.0559	12.3429	0.3499	0.052	0.0342	0.2983	0.3462	1.1196	0.4472	0.2342	0.693	0.8925	0.2125	0.0076	0.0495	0.0268	0.0642	0.0165	0.026	0.1105	0.1274	0.0239	0.042	0.0126	0.6419	0.1514	0.1556	0.0327	0.1288	0.0876	24.0096	0.033	0.1253	0.0372
P14_V1	CG	0.0467	0.0266	0.0658	0.0424	0.2955	0.1324	0.084	0.0348	0.0157	0.2641	0.0825	0.0388	3.7984	0.0956	18.9117	0.5641	0.038	0.0296	0.2165	0.4628	0.7232	0.3752	0.1707	2.3183	0.4252	0.1173	0.0076	0.0553	0.0303	0.112	0.0227	0.0299	0.0992	0.2181	0.0432	0.0302	0.0111	0.2461	0.1163	0.2515	0.1246	0.0725	0.0943	28.8285	0.0413	0.2117	0.0608
P14_V2	CG	0.0809	0.061	0.1016	0.0717	0.4431	0.1052	0.0928	0.0541	0.0126	0.3737	0.1831	0.2465	6.4253	0.1534	25.8716	0.7763	0.0667	0.0549	0.2976	0.6489	1.6322	0.6287	0.25	3.3329	0.7924	0.2096	0.018	0.0917	0.04	0.1031	0.0239	0.0387	0.1395	0.3062	0.0719	0.0505	0.0633	1.0407	0.2104	0.2684	0.1076	0.1298	0.1471	34.233	0.063	0.2546	0.0777
P14_V3	CG	0.0195	0.0171	0.0403	0.0333	0.1493	0.0642	0.0499	0.0321	0.0129	0.1669	0.0996	0.0806	2.624	0.0896	10.6989	0.3712	0.0384	0.0556	0.2197	0.3078	0.7266	0.3422	0.1328	2.3042	0.4078	0.0487	0.0101	0.0357	0.0197	0.1771	0.0292	0.0169	0.0666	0.126	0.0282	0.032	0.0101	0.2948	0.1001	0.1593	0.0755	0.0622	0.0555	21.9759	0.028	0.1369	0.03
P15_V1	EG	0.0601	0.0507	0.0692	0.0512	0.413	0.2242	0.1183	0.0347	0.0082	0.248	0.1376	0.3156	5.2516	0.0761	18.3775	0.5625	0.042	0.0135	0.1292	0.491	1.1181	0.5806	0.2693	1.5733	0.5237	0.28	0.0106	0.0788	0.0339	0.1756	0.0172	0.0751	0.0954	0.2111	0.0796	0.0152	0.0532	0.5048	0.1239	1.281	0.0519	0.0783	0.0954	27.228	0.0345	0.2286	0.0637
P15_V2	EG	0.0291	0.0632	0.0621	0.042	0.1489	0.0523	0.0684	0.0298	0.0055	0.124	0.0585	0.0574	2.2148	0.0642	15.162	0.4386	0.0294	0.0165	0.0859	0.4147	0.4611	0.2896	0.1639	0.9207	0.2847	0.0998	0.0124	0.0385	0.0205	0.0936	0.022	0.0399	0.0688	0.1672	0.026	0.0242	0.0373	0.085	0.0559	0.3327	0.0383	0.0494	0.074	26.6532	0.0224	0.1855	0.0731
P15_V3	EG	0.0601	0.0843	0.0708	0.0525	0.4977	0.1614	0.1028	0.0333	0.0069	0.1821	0.0884	0.1742	2.6606	0.0856	17.142	0.6198	0.0445	0.0301	0.1124	0.4665	0.7073	0.3152	0.1788	3.3027	0.4599	0.0917	0.006	0.0572	0.0261	0.1454	0.0244	0.0415	0.094	0.1888	0.0336	0.0299	0.0253	0.1659	0.0941	0.7829	0.1067	0.0717	0.0919	29.8553	0.0318	0.1705	0.0602
P16_V1	CG	0.017	0.016	0.0249	0.0177	0.0683	0.0342	0.0352	0.0321	0.0166	0.1361	0.0543	0.0454	1.728	0.0196	4.6981	0.1591	0.0155	0.0285	0.1067	0.1302	0.4805	0.2026	0.0703	2.0153	0.3109	0.0342	0.0051	0.0279	0.0107	0.0742	0.0356	0.0194	0.0466	0.0542	0.0121	0.0236	0.0075	0.1118	0.0497	0.1082	0.0814	0.0508	0.0177	15.0551	0.0144	0.088	0.0195
P16_V2	CG	0.027	0.0142	0.0435	0.0298	0.1719	0.0852	0.0722	0.0437	0.0126	0.3484	0.0865	0.0499	2.8321	0.1611	14.351	0.4566	0.0278	0.0454	0.131	0.3689	0.8669	0.38	0.1698	3.384	0.7673	0.0407	0.0106	0.0676	0.0285	0.0441	0.0312	0.0344	0.104	0.1435	0.0676	0.0307	0.4824	0.1289	0.0877	0.3083	0.2598	0.1134	0.0305	23.3035	0.0345	0.2978	0.0794
P16_V3	CG	0.0355	0.0149	0.023	0.0226	0.0489	0.009	0.0433	0.0149	0.251	0.0234	0.0273	0.0363	1.1666	0.0148	3.6435	0.1213	0.0128	0.0128	0.0339	0.0793	0.1461	0.0855	0.0353	0.3524	0.1318	0.0392	0.0076	0.0165	0.0093	0.0233	0.0148	0.0073	0.0534	0.042	0.005	0.0076	0.0028	0.149	0.0135	0.0678	0.011	0.0211	0.0206	12.2772	0.0128	0.1216	0.017
P17_V1	EG	0.0786	0.0415	0.0355	0.0306	0.1465	0.0117	0.0465	0.0113	0.0151	0.104	0.0316	0.0301	1.052	0.0502	12.6229	0.3223	0.04	0.0168	0.1216	0.2731	0.6734	0.2862	0.1422	0.6665	0.722	0.0724	0.0069	0.0272	0.0312	0.2359	0.0296	0.018	0.0642	0.1187	0.0221	0.0115	0.011	0.9093	0.0833	0.3065	0.0461	0.1155	0.0888	32.0351	0.0318	0.0942	0.0289
P17_V2	EG	0.043	0.0438	0.0206	0.0188	0.1272	0.0388	0.0608	0.0107	0.0156	0.0967	0.0585	0.0257	0.6015	0.0474	10.6614	0.2975	0.0268	0.0186	0.0656	0.2115	0.435	0.2713	0.0804	3.3215	0.5253	0.0339	0.0066	0.0254	0.0215	0.1261	0.033	0.0137	0.05	0.0945	0.0275	0.0047	0.2427	0.0989	0.0763	0.4453	0.1114	0.0947	0.0409	27.3275	0.027	0.0943	0.0268
P17_V3	EG	0.0516	0.047	0.028	0.0238	0.0987	0.0036	0.0391	0.0145	0.0108	0.13	0.0589	0.0401	0.5365	0.0516	10.2685	0.2935	0.0464	0.0197	0.147	0.2367	0.7418	0.4326	0.1311	1.4527	0.7762	0.0198	0.0059	0.0274	0.0225	0.0805	0.0277	0.0143	0.0558	0.0992	0.0206	0.0083	0.0172	0.1427	0.0999	0.1728	0.1015	0.0984	0.0566	26.4015	0.0263	0.073	0.0336
P18_V1	CG	0.081	0.0641	0.0981	0.0386	0.4288	0.0666	0.0855	0.0479	0.0096	0.1743	0.0698	0.2225	2.2828	0.0747	17.1833	0.484	0.0119	0.0589	0.1693	0.471	0.7434	0.5598	0.32	3.6493	0.5632	0.2439	0.0093	0.066	0.0354	0.1076	0.0273	0.0372	0.0684	0.1934	0.029	0.038	0.0279	1.3115	0.0821	0.2897	0.4427	0.1513	0.1258	31.1966	0.0373	0.1856	0.0455
P18_V2	CG	0.0067	0.001	0.0059	0.0038	0.033	0.0032	0.0105	0.0082	0.0077	0.0234	0.0105	0.0163	0.2058	0.0045	1.0265	0.0308	0.0024	0.014	0.0373	0.0363	0.0826	0.0437	0.0211	0.1611	0.0647	0.0075	0.0012	0.0079	0.0035	0.1465	0.0195	0.0029	0.0054	0.0123	0.0044	0.0019	0.0017	0.2014	0.0125	0.0333	0.0196	0.0141	0.0041	5.8537	0.0035	0.0141	0.0044
P18_V3	CG	0.0147	0.0165	0.0218	0.0095	0.0743	0.042	0.0186	0.017	0.0109	0.0426	0.025	0.0304	0.7901	0.0104	3.5127	0.1153	0.0106	0.0232	0.046	0.1193	0.193	0.103	0.0496	0.5023	0.1401	0.0521	0.0043	0.0154	0.0072	0.4385	0.0234	0.0059	0.0129	0.0391	0.0068	0.0044	0.0056	0.4317	0.0224	0.0784	0.09	0.036	0.0205	13.4094	0.0097	0.0451	0.0088
P19_V1	EG	0.1092	0.0722	0.0813	0.0857	0.1992	0.0896	0.0956	0.0614	0.0118	0.3306	0.1079	0.458	1.9439	0.0381	22.1167	0.6079	0.0577	0.0563	0.1524	0.3272	1.7218	0.7818	0.4146	2.7453	1.5033	0.1934	0.0164	0.101	0.0434	0.1764	0.0225	0.032	0.1129	0.2231	0.0529	0.0315	0.024	1.6904	0.23	0.2612	0.0581	0.1527	0.1618	23.5996	0.049	0.1867	0.0639
P19_V2	EG	0.046	0.0233	0.0483	0.0281	0.0674	0.066	0.0615	0.0159	0.0031	0.2133	0.0704	0.029	1.1629	0.0236	11.6726	0.3363	0.0321	0.0399	0.1103	0.3244	0.8223	0.3511	0.1513	1.0598	0.7622	0.0446	0.0076	0.0554	0.0222	0.0941	0.024	0.0109	0.0596	0.1168	0.0354	0.01	0.0116	0.19	0.109	0.0851	0.0824	0.0717	0.0596	19.9587	0.0241	0.1106	0.0381
P19_V3	EG	0.3213	0.1426	0.1678	0.1131	0.0878	0.0117	0.1256	0.074	0.0245	0.502	0.1645	0.305	3.2211	0.1142	35.0753	1.0777	0.0766	0.096	0.225	0.7606	2.2731	0.7794	0.6801	0.8726	1.9469	0.3832	0.0274	0.211	0.0678	0.2459	0.0366	0.0172	0.2012	0.3296	0.0951	0.0767	0.0745	1.8483	0.3655	0.1674	0.0973	0.1912	0.2853	61.3762	0.0884	0.3085	0.1078
P20_V1	CG	0.0218	0.0332	0.0615	0.0297	0.1379	0.0387	0.0736	0.0364	0.0209	0.121	0.0801	0.0176	1.9071	0.015	12.6691	0.4178	0.0264	0.1317	0.2185	0.4354	0.989	0.3396	0.1017	4.0128	0.5357	0.058	0.0101	0.0409	0.0201	0.3102	0.0637	0.0403	0.0639	0.1462	0.0234	0.0081	0.0175	0.2261	0.0511	0.3607	0.281	0.0821	0.138	26.0731	0.0217	0.1112	0.0546
P20_V2	CG	0.0647	0.1656	0.0442	0.0214	0.2283	0.2726	0.1221	0.056	0.006	0.2189	0.0472	0.0083	2.0604	0.0232	12.4142	0.3834	0.0313	0.1061	0.252	0.4626	1.3401	0.3541	0.2038	3.6179	0.4969	0.0466	0.0057	0.0489	0.028	0.1661	0.0265	0.0319	0.0696	0.1515	0.0223	0.0446	0.0264	0.1746	0.0677	0.4075	0.4438	0.0972	0.0939	32.7836	0.0247	0.1209	0.0503
P20_V3	CG	0.0466	0.0376	0.0472	0.0199	0.2071	0.0938	0.1105	0.0414	0.0168	0.0749	0.0287	0.0055	1.5763	0.0153	9.2218	0.2818	0.0218	0.0795	0.1745	0.2884	0.742	0.24	0.0847	1.6665	0.3255	0.0178	0.0066	0.0291	0.0132	0.07	0.0405	0.0299	0.0395	0.1097	0.0127	0.0206	0.006	0.1062	0.0454	0.4026	0.1397	0.0461	0.0624	23.0309	0.0229	0.0645	0.03

## Sheet: precision
Precision
	β-Aminoisobutyrate	1-Methylnicotinamide	2-Hydroxyisobutyrate	3-Hydroxyisovalerate	3-Indoxylsulfate	3-Methylxanthine	4-Hydroxyphenylacetate	Acetate	Acetone	Alanine	Betaine	Carnitine	Citrate	Creatine	Creatinine	Dimethylamine	Dimethylglycine	Dimethylsulfone	Formate	Gluconate	Glycine	Glycolate	Guanidoacetate	Hippurate	Histidine	Hypoxanthine	Isoleucine	Lactate	Leucine	Mannitol	Methanol	Methylamine	Methylsuccinate	Pseudouridine	Pyruvate	Succinate	Tartrate	Taurine	Threonine	TMAO	Trigonelline	Tyrosine	Uracil	Urea	Valine	cis-Aconitate	trans-Aconitate
CV %	2.16092	2.06949	3.17823	3.502	0.166337	3.17826	2.29516	7.04226	1.32946	1.45304	1.77802	1.72745	0.399107	9.38175	2.5858	0.47204	3.01127	1.28089	1.44011	2.09552	0.889313	1.25333	2.1582	0.797208	0.40237	2.40565	1.82475	0.769606	2.6687	2.25709	1.28247	1.41917	2.49612	1.33538	6.65219	18.8883	2.86013	1.373	1.71501	1.09711	1.00968	0.465246	4.1487	2.06868	2.15012	0.931924	1.93675

## Sheet: legend
Name	Description
ID	number of participants and visit
Visit	Visit 1 = V1 (first spot urine sample before intervention), Visit 2 = V2 (second spot urine sample one day after intervention), Visit 3 = V3 (third spot urine sample four days after intervention)
Group	Experimental Group = EG, Control Group = CG
Metabolite	metabolite in mM
	excluded from further statistical analysis due to biological implausibility
	dropout
CV	coefficient of variation in %
