# Supplementary material for: High-Intensity Interval Training Decreases Resting Urinary Hypoxanthine Concentration in Young Active Men—A Metabolomic Approach
Source: Metabolites. 2019 Jul 10;9(7):137. doi: 10.3390/metabo9070137 (PMC6680906; doi:10.3390/metabo9070137)
Supplement: Supplementary file 1 [file metabolites-09-00137-s001.zip › Table S3_Original LC-MS data.xlsx]

## Sheet: raw data LC-MS (µM)
Table S3: Original LC-MS data of all metabolites in fasting spot urine samples
ID_Visit	Group	β-Aminoisobutyrate	y-Aminobutyrate	y-Butyrobetaine	p-Methylhistidine	t-Methylhistidine	ADMA	Anserine	Arginine	Betaine	Betonicine	Carnitine	Carnosine	Choline	Citrulline	Creatine	Dimethylamine	N,N-Dimethylglycine	Histidine	N-Methylarginine	N-Methylproline	Proline	Sarcosine	SDMA	Stachydrine	Trigonelline	Trimethylamine	TMAO
P01_V1	EG	11.4	0.4	1.7197	78.4	79.725	16.1073	0.2844	13.375	260.775	0.25	119.15	2.775	8.1	5.275	5.5	88.727	35.7	221.575	0.132512	3.025	9.45	1.15	122.681	68.4667	40.1239	1.03552	171.7
P01_V2	EG	32.55	1	5.78443	129.175	365.225	66.5985	0.53088	31.05	1006.83	1.85	391.375	8.825	33.85	7.1	56.425	428.977	147.675	862.4	0.208233	20.525	33.55	6.025	569.457	533.427	139.31	5.07404	1700.2
P01_V3	EG	38.025	0.875	7.8168	477.525	377.9	81.4403	1.66848	34.75	1178.72	2.775	552.7	11.85	35.175	11.675	71.2	477.498	164.1	943.25	0.189302	17.15	45.05	4.15	657.556	401.155	317.247	6.42021	810.75
P02_V1	EG	136.475	0.85	0.410382	13.375	78.775	18.1501	0.03792	8.325	20.35	0.2	21.325	2.3	9.95	4.475	15.9	101.692	13.175	208.2	0.227163	0.3	3	0.225	153.482	14.0243	26.3091	0.911256	151.675
P02_V2	EG	187.675	0.625	1.60244	37.85	133.425	24.6761	0.49296	12.625	43.5	0.85	102.9	6.95	12	4.3	8.975	131.538	22.35	332.2	0.302884	1.375	3.2	0.2	265.012	191.356	27.531	1.57399	166.425
P02_V3	EG	265.85	2.2	4.96367	120.425	211.4	37.7102	0.3792	15.425	63.95	0.475	318.025	11.35	15.475	5.85	20.875	197.174	27.725	505.5	0.151442	1.1	6.7	0.35	369.922	164.457	62.8857	1.73967	465.825
P03_V1	CG	51.85	1.75	1.40702	216.2	450.9	60.452	1.45992	30.275	104.4	0.8	44.975	36.2	25.425	7.15	65.475	475.585	41.525	1166.9	0.0567907	3	10.725	0.7	685.951	463.547	92.21	4.12136	873.45
P03_V2	CG	26.775	1.6	5.37405	207.125	286.875	38.4333	1.34616	18.625	84.35	0.3	220.45	28.8	15.5	7.125	44.75	253.937	27.5	819.1	0.246093	1.775	6.475	0.65	400.517	310.088	27.2551	0.807704	431.225
P03_V3	CG	32.125	1.075	3.81069	65.875	201.75	30.4972	0.81528	18.6	95.775	0.375	181.9	18.325	14.525	8.2	20.625	189.036	35.9	786.15	0.473256	3.8	6.25	0.9	333.441	305.265	32.2804	1.38759	705.85
P04_V1	EG	58.25	0.725	1.15298	263.525	225.25	41.8681	1.11864	18.6	42.35	0.2	79.8	13.8	17.4	5.15	39.5	286.21	22.6	486.4	0.227163	0.775	7.025	0.2	481.283	218.456	260.017	3.6036	404.05
P04_V2	EG	55.225	1.55	2.9313	1013.08	252.475	39.0118	4.70208	17.5	55.35	0.75	269.375	29.475	17.15	5.075	27.05	250.537	28.125	680.2	0.227163	1.3	7.125	0.525	433.331	508.203	198.727	1.55328	334.6
P04_V3	EG	162.85	0.825	1.83695	288.35	311.05	43.8928	1.38408	18.6	45.15	0.6	158.3	29.625	19.475	13.375	36.65	321.383	22.95	528.8	0.170372	1.6	7	0.5	552.081	367.698	271.25	3.95568	1369.33
P05_V1	EG	16.45	0.475	0.371298	17.025	44.975	12.7448	0.11376	13.075	10.525	2.825	12.45	2.375	4.075	4.625	6.65	73.5541	5.5	180.7	0.359675	0.425	4.9	0.275	121.327	236.374	188.026	0.683442	96.475
P05_V2	EG	74.825	1.175	0.39084	188.1	91.675	19.5963	0.89112	12.4	20.375	6.7	7.775	5.65	11.35	5.175	11.6	141.236	12	295.475	0.170372	0.975	3	0.225	197.579	299.494	229.175	0.704152	218.6
P05_V3	EG	30.175	0.675	0.39084	120.675	43.225	9.20158	0.45504	8.1	9.325	0.75	19.35	2.55	4.85	2.9	4.325	67.064	4.4	134.45	0.189302	0.125	1.8	0.45	98.9869	58.6598	125.2	0.55918	71.1
P06_V1	CG	63.25	2.5	5.76489	354.875	348.45	53.2571	2.37	23.375	106.975	0.15	423.775	21.85	24.05	5.75	42.875	283.135	40.35	1185.25	0.0567907	0.85	5.25	1.3	441.248	99.9456	61.9398	2.11246	611
P06_V2	CG	83.875	1.225	1.89557	1031.5	323.025	46.2971	5.10024	28.225	72.35	0.275	127.875	15.4	26.675	6.625	39.475	220.868	46.875	814.125	0.0567907	0.6	5.25	1.45	400.16	64.8547	72.9167	3.1894	601.125
P06_V3	CG	57.525	1.35	4.24061	143.2	211.55	38.9214	0.51192	17.625	64.075	0.075	256.075	9.775	20.1	11.425	46.35	206.461	28.575	708.925	0.227163	0.625	4.85	0.375	294.648	45.4225	26.5259	1.69825	1492.98
P07_V1	EG	915.425	1.95	4.92458	1099.47	343.3	64.3026	2.48376	22.95	63.95	7.55	162.975	17.3	33.225	7.825	60.675	779.411	15.675	638.55	0.359675	0.8	10.15	0.475	741.838	52.4447	322.43	4.05923	3483.75
P07_V2	EG	137.075	1.5	0.898932	1222.38	251.35	44.6882	4.9296	19.05	36.9	1.975	26.325	13.2	31.5	9.675	28.975	239.603	13.075	531.875	0.340744	0.675	9.75	0.825	476.036	13.3382	196.658	4.18349	299.475
P07_V3	EG	406.4	2.05	4.37741	587.05	365.25	67.9182	1.64952	27.825	61.725	11.175	179.4	19.2	31.3	6.475	194.65	450.537	15.9	653.8	0.302884	0.925	10.05	0.2	691.536	39.611	285.498	3.93497	502.95
P08_V1	CG	56.3	1.675	0.78168	1099.75	412.7	63.5976	22.8468	26.2	73.125	0.5	47.6	22.6	29.675	10.075	166.95	301.781	55.925	1422.45	0.113581	3.675	5.125	2	498.79	284.682	180.656	3.79	949.35
P08_V2	CG	28.25	2.625	1.97374	103.825	306.4	63.6518	1.422	25.425	53.25	0.55	120.675	22.625	21.85	7.025	44.275	323.738	25.575	964.5	0.075721	1.125	7.675	0.225	489.049	201.687	243.187	3.81071	203.175
P08_V3	CG	49.95	1.1	3.69344	249.875	322.325	69.2197	0.7584	23.175	80.55	0.925	225.75	16.05	24.525	9.475	35.45	448.845	37.575	1011.18	0.113581	1.875	7.8	0.55	575.944	196.32	190.175	2.75448	1657.7
P09_V1	CG	45.15	0.85	5.29588	1198.35	293.725	59.0058	2.37	26.975	166.575	1.025	371.95	15.425	24.175	6.075	22.75	300.633	114.175	1098.75	0.0946512	2.55	8.2	1.725	641.346	252.8	151.43	2.54737	287.525
P09_V2	CG	9.475	0.325	0.9771	27.975	110.425	24.6942	0.43608	13.1	47.15	3.825	58.95	8.075	11.7	5.75	18.3	129.169	30.85	420.925	0.0946512	0.625	4.35	0.45	193.724	50.3865	47.8688	1.73967	155.8
P09_V3	CG	44.775	1.1	12.6437	94.375	262.55	52.6424	0.54984	23.225	133.775	2.8	776.2	15.3	22.175	7.875	32.05	303.208	80.3	869.45	0.075721	0.9	4.75	1.525	498.15	53.9783	186.312	2.09175	278.525
P10_V1	CG	24.05	0.65	0.644886	63.65	153.25	37.6741	0.11376	20.725	38.675	1.025	50.175	2.325	10.925	8.05	27	206.77	21.55	369.7	0.227163	1.25	6.725	0.2	334.175	153.379	167.255	1.84322	226.575
P10_V2	CG	13.5	1.175	0.273588	40.925	95.9	24.1157	0.30336	13.2	28.5	0.175	21.15	2.45	8.9	4.65	17.05	122.311	20.675	269.2	0.227163	0.45	6.3	1.75	178.154	29.0776	111.07	1.05623	178.65
P10_V3	CG	19.425	0.55	0.625344	149.025	104.75	23.8988	0.36024	12.85	41.45	0.525	62.45	3.475	9.025	4.7	24.725	142.311	22.375	320	0.151442	2.75	9.025	0.125	185.337	110.217	142.01	0.911256	179.325
P11_V1	EG	593.175	3.8	4.59237	793.75	469.45	103.821	5.1192	37.225	82.775	0.3	187.125	38.15	40.5	6.45	105.6	523.885	56.55	2247.9	0.132512	0.9	13.1	1.75	981.576	63.8861	340.225	5.77819	818.05
P11_V2	EG	467.65	2.95	0.625344	122.6	303.075	56.6195	1.06176	30.25	30.925	0.125	16.925	24.3	22.65	9.625	43.95	313.113	27.775	1244.85	0.170372	0.575	11.15	0.5	537.884	69.7985	196.166	2.71306	907.325
P11_V3	EG	329.275	1.6	0.918474	101	273.475	62.3502	0.60672	22.725	38.1	0.55	43.25	20.35	21.425	8.225	39.275	343.194	31.65	1527.28	0.151442	0.9	8.1	1.375	573.293	259.076	209.133	3.33437	316.375
P12_V1	EG	16.8	0.85	0.820764	734.65	149.95	26.4839	1.95288	18.15	32.675	29.4	74.95	2.45	28.875	4.65	301.45	118.793	19.075	520.875	0.189302	0.5	4.05	0.4	209.633	36.3017	139.803	4.63912	361.55
P12_V2	EG	16.7	0.625	1.03573	287.85	78.475	21.4221	0.41712	12.7	36.125	0.85	113.175	3.2	19.85	5.725	2590.03	94.1869	26.8	437.175	0.113581	0.45	3.075	0.35	176.142	76.3969	43.3164	2.13317	423.15
P12_V3	EG	21.975	0.65	2.98993	980.225	190.45	36.8786	3.14736	20.975	59.45	1.325	343.675	6.225	28.4	4.35	71.35	183.635	31.475	726.3	0.113581	1.4	5.275	1.025	286.994	410.114	140.118	2.42311	451.275
P13_V1	CG	46.1	0.6	0.918474	90.55	213.175	42.3924	0.948	33	96.05	0.625	85.875	21.4	16.775	5.775	27.475	256.453	34.875	814.3	0.0946512	2.25	10.925	1.15	376.541	458.926	80.2083	2.54737	529.075
P13_V2	CG	n.a.	n.a.	n.a.	n.a.	n.a.	n.a.	n.a.	n.a.	n.a.	n.a.	n.a.	n.a.	n.a.	n.a.	n.a.	n.a.	n.a.	n.a.	n.a.	n.a.	n.a.	n.a.	n.a.	n.a.	n.a.	n.a.	n.a.
P13_V3	CG	52.95	0.55	1.27023	44.675	178.95	47.2553	0.58776	25.4	105.4	0.65	100.75	18.25	23.325	6.2	33.475	220.088	50.075	1079.88	0.0946512	2.625	8.675	1.4	419.115	280.808	29.5214	2.83732	193.075
P14_V1	CG	34.4	1.1	1.05527	131.3	240.9	65.4053	0.79632	25.525	81.7	0.325	43.125	25.95	30.65	3.875	57.25	389.463	46.125	483.65	0.075721	0.825	8.3	3.2	654.848	12.4705	109.276	6.85513	365.775
P14_V2	CG	48.325	2.1	4.96367	83.425	403.45	86.9721	0.68256	37.25	198.2	2.7	292.725	35.325	48.525	10.65	91.6	539.956	83.125	922.65	0.151442	1.275	15.6	5.1	846.24	91.531	97.5704	10.0238	397.175
P14_V3	CG	18.475	0.45	1.32886	51.225	140.7	35.7397	0.3792	18.275	92.325	0.45	89.675	15.4	21.25	4.45	55.45	222.546	37.075	437.05	0.0946512	1.05	8.875	2	290.154	18.4636	65.0338	3.1894	209.525
P15_V1	EG	56.5	0.85	8.67665	1694	362.275	66.7069	11.2812	29.475	94.35	0.925	358.45	21.35	58.075	8.125	46.8	401.207	52.65	566.925	0.0567907	1.4	8.025	1.225	557.121	177.755	42.2523	7.91136	1784.97
P15_V2	EG	26.3	0.6	1.48519	195.525	253.45	53.7994	0.11376	20.325	51.925	2.625	70.15	10.15	21.8	7	45.25	324.503	31.9	346.975	0.0946512	0.875	5.825	0.4	511.652	172.186	30.5265	4.41131	500.225
P15_V3	EG	40.275	0.675	3.61527	421.925	299.975	58.7527	0.89112	20.525	74.8	1.025	191.1	13.825	18.625	9.825	50.15	383.856	51.675	467.425	0.113581	1.175	7.6	1.225	543.168	159.493	93.3925	1.2012	1076.47
P16_V1	CG	13.975	0.125	0.859848	34.275	126.35	17.9331	0.49296	12.775	57.5	0.725	54	9.9	14.175	4.575	12.475	110.846	17.325	399.975	0.132512	4.675	7.8	0.725	163.486	225.094	74.1582	1.84322	152.75
P16_V2	CG	25.3	2.425	1.25069	45.1	261.75	56.9811	0.474	19.625	83.9	0.325	49.25	29.525	33.75	10.475	162.925	305.269	35.425	964.25	0.0567907	3.675	13.375	1.2	480.737	411.284	243.285	6.33737	456.975
P16_V3	CG	46.25	0.325	0.78168	6.925	76	12.8894	0.34128	9.775	27.45	0.05	43.8	8.725	7.325	8.55	8.825	82.0456	8.3	193.925	0.189302	0.375	4.55	0.25	158.729	60.8593	7.19313	0.973387	102.425
P17_V1	EG	72.6	0.75	0.566718	878.425	238.575	40.4942	3.28008	29.025	34.25	3.35	39.95	17.225	15.15	6.925	30.525	225.121	36.225	943.9	0.151442	0.45	4.4	0.65	367.929	31.7816	44.2033	2.5888	418.575
P17_V2	EG	35.225	0.675	0.410382	1102.2	214.775	32.088	7.22376	29.175	29.45	2	28.7	18.8	14.65	5.375	28.45	212.406	23.6	674.975	0.132512	0.775	4.85	0.3	292.203	34.9699	104.31	2.54737	628.875
P17_V3	EG	38.675	0.975	0.469008	953.625	225.625	32.9558	1.66848	26.725	38.275	5.45	44.75	18.5	18.925	9.6	23.95	203.238	37	984.825	0.170372	0.95	6.125	0.525	314.825	22.6204	96.112	2.73377	224.375
P18_V1	CG	81.35	3.675	3.79115	31.225	251.6	83.9712	0.34128	30.75	70.75	5.15	274	7.45	24.325	6.975	46.375	338.779	14.05	699.45	0.208233	1.85	12.075	0.625	608.307	50.104	434.603	3.81071	434.35
P18_V2	CG	4.35	0.1	0.234504	19.05	13.2	4.48328	0.1896	8.925	8.6	0.45	18.325	0.875	6.15	5.575	2.375	16.8801	2.7	86.175	0.170372	0.45	3.775	0	31.9301	1.31162	16.2782	0.662732	43.225
P18_V3	CG	12.05	0.5	0.48855	8.4	54.2	17.1558	0.15168	10.95	20.325	0.25	38.65	2.375	7.9	5.15	5.575	75.5703	5.9	187.525	0.283954	0.45	4.575	0.15	118.299	9.3226	88.8598	0.766284	112.05
P19_V1	EG	86.625	1.325	15.36	121.275	396.05	86.2852	2.61648	34.55	117.125	5.725	581.35	51.3	22.725	7.325	43.325	463.385	65.625	1991.95	0.113581	5.375	14	0.825	754.644	573.824	42.3705	3.56218	392.225
P19_V2	EG	37.1	1.175	1.27023	453.85	219.075	44.5978	4.85376	18.975	63.025	7.9	43.55	32.125	17.025	6.1	25.375	268.462	43.925	1010.07	0.170372	11.775	5.525	0.875	417.178	1187.06	76.6413	3.25153	120.175
P19_V3	EG	211.5	2.1	8.44214	1725.22	615.1	114.089	9.93504	48.125	122.35	2.55	335.65	65.8	31.8	7.8	48.75	516.056	69.35	1992.55	0.416465	5.85	17.275	0.8	1023.66	962.347	54.8649	3.87284	217.55
P20_V1	CG	26.2	1.825	0.449466	762.575	249.675	48.4846	2.63544	19.075	47.425	2.925	9.775	19.15	21.9	7.3	23.3	287.064	33.025	598.95	0.0567907	0.65	5.125	0.8	418.964	15.8807	271.309	3.45863	534.15
P20_V2	CG	n.a.	n.a.	n.a.	n.a.	n.a.	n.a.	n.a.	n.a.	n.a.	n.a.	n.a.	n.a.	n.a.	n.a.	n.a.	n.a.	n.a.	n.a.	n.a.	n.a.	n.a.	n.a.	n.a.	n.a.	n.a.	n.a.	n.a.
P20_V3	CG	35.825	1.175	0.175878	146.125	168.85	38.3249	0.79632	25.875	30	0.775	3.525	17.275	11.575	9.6	11.275	215.35	25.65	441.6	0.113581	0.675	5.925	0.15	385.003	23.5285	141.931	2.50595	636.075

## Sheet: precision
Precision & Accuracy Day-to-Day		β-Aminoisobutyrate	y-Aminobutyrate	y-Butyrobetaine	p-Methylhistidine	t-Methylhistidine	ADMA	Anserine	Arginine	Betaine	Betonicine	Carnitine	Carnosine	Choline	Citrulline	Creatine	Dimethylamine	N,N-Dimethylglycine	Histidine	N-Methylarginine	N-Methylproline	Proline	Sarcosine	SDMA	Stachydrine	Trigonelline	Trimethylamine	TMAO
Level 0	CV %	15.3887	<LLOQ	8.87683	8.54919	8.00521	5.11358	<LLOQ	7.18699	4.89353	<LLOQ	4.43238	<LLOQ	4.11884	≤LLOQ	5.21215	10.0747	2.17847	5.60301	<LLOQ	8.23453	12.1369	20.1118	6.79369	7.22772	6.15582	10.0752	4.97494
Level 1	CV %	18.0599	18.167	8.3608	8.08389	7.37343	7.40519	5.56342	6.59861	7.47461	4.37478	4.68993	4.32197	5.19526	7.42241	6.44173	8.42024	3.7667	5.76776	33.1282	8.23035	7.00364	10.6254	8.98787	7.55758	5.53325	19.556	4.94555
Level 2	CV %	11.856	12.3882	4.92365	3.1043	5.24343	4.77783	4.55545	3.47786	3.62049	2.52228	3.06429	5.40621	3.22428	5.43226	7.11538	7.7909	2.92741	3.49758	13.0816	2.70045	8.49033	5.33283	11.0142	4.12264	3.12587	4.68418	4.08433

## Sheet: legend
Name	Description
ID	number of participants and visit
Visit	Visit 1 = V1 (first spot urine sample before intervention), Visit 2 = V2 (second spot urine sample one day after intervention), Visit 3 = V3 (third spot urine sample four days after intervention)
Group	Experimental Group = EG, Control Group = CG
Metabolite	metabolite in µM
	dropout
n.a.	not available due to technical measurement errors
	excluded from further statistical analysis as values of P13 at V2 are missing
	excluded from further statistical analysis due to biological implausibility
CV	coefficient of variation in %
